# 1 **Precise, pan-cancer discovery of gene fusions reveals a signature of selection in primary** 2 **tumors**

3  
4 Donald Eric Freeman<sup>1,3</sup>, Gillian Lee Hsieh<sup>1</sup>, Jonathan Michael Howard<sup>1</sup>, Erik Lehnert<sup>2</sup>, Julia  
5 Salzman<sup>1,3,4\*</sup>

## 6 7 **Author affiliation**

8 <sup>1</sup>Stanford University Department of Biochemistry, 279 Campus Drive, Stanford, CA 94305

9 <sup>2</sup>Seven Bridges Genomics, 1 Main Street, Suite 500, Cambridge MA 02142

10 <sup>3</sup>Stanford University Department of Biomedical Data Science, Stanford, CA 94305-5456

11 <sup>4</sup>Stanford Cancer Institute, Stanford, CA 94305

12  
13 \*Corresponding author [julia.salzman@stanford.edu](mailto:julia.salzman@stanford.edu)

## 14 15 **Short Abstract:**

16 The extent to which gene fusions function as drivers of cancer remains a critical open question  
17 in cancer biology. In principle, transcriptome sequencing provided by The Cancer Genome  
18 Atlas (TCGA) enables unbiased discovery of gene fusions and post-analysis that informs the  
19 answer to this question. To date, such an analysis has been impossible because of  
20 performance limitations in fusion detection algorithms. By engineering a new, more precise,  
21 algorithm and statistical approaches to post-analysis of fusions called in TCGA data, we report  
22 new recurrent gene fusions, including those that could be druggable; new candidate pan-cancer  
23 oncogenes based on their profiles in fusions; and prevalent, previously overlooked, candidate  
24 oncogenic gene fusions in ovarian cancer, a disease with minimal treatment advances in recent  
25 decades. The novel and reproducible statistical algorithms and, more importantly, the biological  
26 conclusions open the door for increased attention to gene fusions as drivers of cancer and for  
27 future research into using fusions for targeted therapy.

## 28 29 **Introduction**

30 While genomic instability is a hallmark of human cancers, its functions have only partially  
31 been explained. Point mutations and gene dosage effects result from genomic instability, but  
32 they alone do not explain the origin of human cancers (Martincorena et al., 2015). Genomic  
33 instability also results in structural variation in DNA that creates rearrangements, including local  
34 duplications, deletions, inversions or larger scale intra- or inter-chromosomal rearrangements  
35 that can be processed into mRNAs that are gene fusions.

36 Gene fusions are known to drive some cancers and can be highly specific and  
37 personalized therapeutic targets; among the most famous are the BCR-ABL1 fusion in chronic  
38 myelogenous leukemia (CML), and the EML4-ALK fusion in non-small lung cell carcinoma  
39 (Soda et al., 2007; Nowell and Hungerford, 1960). Fusions are among the most clinically  
40 relevant events in cancer because of their use to direct targeted therapy and because of early  
41 detection strategies using RNA or proteins; moreover, as they are truly specific to cancer, they  
42 have promising potential as neo-antigens (Zhang, Mardis and Maher, 2017; Ragonnaud and  
43 Holst, 2013; Liu and Mardis, 2017).

44 Because of this, major efforts by clinicians and large sequencing consortia attempt to  
45 identify fusions expressed in tumors. However, these attempts are limited by critical roadblocks:  
46 current algorithms suffer from high false positive rates and unknown false negative rates. Thus,  
47 heuristic approaches and filters are imposed, including taking the consensus of multiple  
48 algorithms or imposing priority on the basis of gene ontologies given to fusion partners. These  
49 approaches lead to what third party reviews agree is imprecise fusion discovery and bias  
50 against discovering novel oncogenes (Liu et al., 2015; Carrara et al., 2013; Kumar et al., 2016).  
51 Both shortcomings in ascertainment of fusions by existing algorithms and using recurrence  
52 alone to assess function limit the use of fusions to discover new cancer biology. As one of many  
53 examples, a recent study of more than 400 pancreatic cancers found no recurrent gene fusions,  
54 raising the question if this is due to high false negative rates or this means that fusions are not  
55 drivers in the disease (Bailey et al., 2016). Recurrence of fusions is currently one of the only  
56 standards in the field used to assess functionality of fusions, but the most frequently expressed  
57 fusions may not be the most carcinogenic (Saramäki et al., 2008); on the other hand, there may  
58 still be many undiscovered gene fusions that drive cancer.

59 Thus, the critical question, “are gene fusions under-appreciated drivers of cancer?”, is  
60 still unanswered. In this paper, we provide several contributions that more precisely define and  
61 provide important advances to answering this question. First, we provide a new algorithm that  
62 has significant improvements in precision for unbiased fusion detection in massive genomics  
63 datasets. Our new algorithm, sMACHETE (scalable MACHETE), significantly builds on our  
64 recently developed MACHETE algorithm (Hsieh et al., 2017) to discover new gene fusions and  
65 pan-cancer signatures of selection. Its algorithmic advance over MACHETE is to use novel  
66 modeling to account for challenges brought on by “big data”: statistical modeling to identify false  
67 positives and avoid heuristic or human-guided filters that are commonly imposed by other fusion  
68 detection algorithms. We have systematically evaluated sMACHETE’s false positive rate, which  
69 is much lower than other algorithms, and show that sMACHETE has sensitive detection of gold

70 standard positive controls. Beyond recovery of known fusions, sMACHETE predicts novel  
71 fusions, the focus of this paper. These fusions include recurrent fusions, two of which we  
72 validate in independent samples, and recurrent 5' and 3' partner genes.

73 The improved precision of sMACHETE has allowed us to address several unresolved  
74 questions in cancer biology. First, until now, a large fraction of ovarian cancers have lacked  
75 explanatory drivers beyond nearly universal TP53 mutations and defects in homologous  
76 recombination pathways. Because TP53 mutations create genome instability, a testable  
77 hypothesis is that TP53 mutations permit the development of rare or private driver fusions in  
78 ovarian cancers, and the fusions have been missed due to biases in currently available  
79 algorithms. We apply sMACHETE to RNA-Seq data from bulk tumors and find that 91% of the  
80 ovarian tumors we screened have detectable fusions and that 54% of the ovarian cancer tumors  
81 express gene fusions involving kinase pathways or known Catalogue of Somatic Mutations In  
82 Cancer (COSMIC) genes (Forbes et al., 2014). We also identify novel although low-prevalence  
83 recurrent fusions in other cancers, including pancreatic cancer, where they have not been  
84 described previously.

85 Frequent recurrence of gene fusions is a hallmark of a selective event during tumor  
86 initiation, and this recurrence has historically been the only evidence available to support that a  
87 fusion drives a cancer. While private or very rare gene fusions are beginning to be considered  
88 as potential functional drivers (Latysheva and Babu, 2016), the high false positive rates in  
89 published algorithms prevent a statistical analysis of whether private or rare gene fusions  
90 reported exhibit a signature of selection across massive tumor transcriptome databases, such  
91 as TCGA. Signatures of selective advantage of fusion expression include recurrent use of a 5'  
92 or 3' partner, or enrichment of gene families such as those in Catalogue Of Somatic Mutations  
93 In Cancer (COSMIC). We formulate and provide the first such analysis.

94 In sum, sMACHETE is an advance in accuracy for fusion detection in massive RNA-Seq  
95 data sets. The algorithm is reproducible and publicly available, and its results have important  
96 biological implications. sMACHETE, applied to hundreds of TCGA RNA-Seq samples, in  
97 conjunction with new statistical analysis reveals a signature of fusion expression consistent with  
98 the existence of under-appreciated drivers of cancer, including selection for rare or private gene  
99 fusions in human cancers with implications from basic biology to the clinic.

100

101

102 **Results:**

103

## 104 **sMACHETE is a new statistical algorithm for gene fusion discovery**

105 We engineered a new statistical algorithm, the scalable MACHETE (sMACHETE), to  
106 discover and estimate the prevalence of gene fusions in massive numbers of data sets. The  
107 major computational infrastructure of sMACHETE includes a fusion-nomination step performed  
108 by the MACHETE. However, sMACHETE includes key innovations mainly focused on  
109 controlling false positives arising from analysis of massive RNA-Seq data sets for fusion  
110 discovery, a problem conceptually analogous to multiple hypothesis testing via p-values but  
111 which cannot be solved by direct application of common FDR controlling procedures.

112 The workflow of sMACHETE is as follows: MACHETE is first run on a subset of samples  
113 (the “discovery set”) for fusion discovery and modeling. Models of the effect of sequence  
114 composition and gene abundance in generating false positive fusion nomination are applied  
115 (Supplemental File). Next, the prevalence of the nominated fusions is efficiently tested in the  
116 discovery set along with an arbitrarily large number of added samples (the “test set”), easily  
117 numbering thousands, using Sequence Bloom Trees (SBTs; Solomon and Kingsford, 2016) and  
118 subsequent statistical modeling (see Fig. 1, Methods and Supplemental File). This step further  
119 decreases false positive identification of fusions beyond those decreases achieved by  
120 MACHETE, which are already lower than any other published algorithm (Hsieh et al., 2017), and  
121 increases the precision of fusion prevalence rate estimation. Intuitively, this step checks whether  
122 the prevalence of fusions found by running MACHETE is statistically consistent with the  
123 estimated prevalence using a string-query based approach (such as SBT). We note that  
124 because the SBT searches for fusion-junctional sequences, samples could be positive for a  
125 fusion by a SBT yet negative by MACHETE, which requires spanning reads to nominate fusions  
126 (Hsieh et al., 2017).

127 Like MACHETE, sMACHETE does not require human guidance and is a fully automatic  
128 pipeline. Moreover, most parts are very portable as they are Dockerized, and most components  
129 of the workflows can be easily exported to many platforms using a description given by the  
130 Common Workflow Language (CWL). sMACHETE can be applied to any RNA-Seq dataset,  
131 including any massive cancer genomics datasets. And, assuming one has access to the secure  
132 TCGA database, the analysis we present in this paper is reproducible. (See Supplemental File;  
133 also, the code used, including CWL code and Dockerfiles, is available at github sites given in  
134 the Supplemental File.)

135

## 136 **sMACHETE improves specificity of fusion detection without sacrificing sensitivity**

137 Compared to current state of the art fusion callers, sMACHETE reduces false positives,  
138 the most measurable metric for errors. But this rate can only be exactly computed under  
139 simulated conditions where the ground truth is known. As a proxy for ground truth, normal  
140 controls are used under the assumption that fusions detected in normal tissues should be rare,  
141 as is the case for some germline fusions such as TFG-GPR128 (Chase et al., 2010). We have  
142 adopted the common simplifying assumption that prevalent fusions called in normal samples  
143 that cannot be explained by readthrough transcription are false positives (Lee et al., 2017;  
144 Kumar et al., 2016).

145 MACHETE, the workhorse of sMACHETE, has been benchmarked on a group of normal  
146 samples and simulated data with the lowest false positive rate and highest positive predictive  
147 value (PPR) of published algorithms (Hsieh et al., 2017, and Supplemental File). Theoretical  
148 analysis of the algorithm formally implies that sMACHETE maintains or improves the already  
149 low false-positive rate of MACHETE. In this paper, we go further and quantify sMACHETE's  
150 FPR on the Illumina Body Map data set because it is comparable in its age, depth and read  
151 length to TCGA data; further, there are not large numbers of normal samples of the same  
152 vintage as the TCGA data analyzed here, and TCGA samples classified as normal are not  
153 molecularly normal (personal communication with TCGA). sMACHETE increases specificity on  
154 the Body Map compared to the consensus best existing algorithm tested, ChimerSeq (Lee et al.,  
155 2017), which reports significantly more fusions in cancer samples that are also detected in  
156 normals, suggesting they are false positives (Fig. 4). We have used fusions called by  
157 ChimerSeq to compare sMACHETE's sensitivity and specificity because ChimerSeq entails  
158 performance benchmarking of multiple 'top performing' algorithms, and, using a disciplined  
159 procedure for evaluating them, instantiates a meta-caller to produce more reliable calls than any  
160 algorithm independently (Lee et al., 2017) .

161 Any algorithm's FPR can be trivially reduced by sacrificing sensitivity. However, we find  
162 that sMACHETE's precision may in fact improve sensitivity. In primary tumors, no ground truth  
163 is known, so we use well-studied and generally cytogenetically simple tumor types such as  
164 acute myeloid leukemia (LAML) as a best approximation. In a large cohort of LAML samples  
165 investigated through both next-generation sequencing and cytogenetics by a large consortium  
166 (Cancer Genome Atlas Research Network, 2013; Papaemmanuil et al., 2016), sMACHETE  
167 improves the rate of true positive recovery compared to ChimerSeq (Lee et al., 2017), when  
168 using nomination of fusions between homologous genes as a proxy for false positives (Fig. 4C,  
169 and Supplemental File).

170 sMACHETE maintains high precision in a variety of solid tumors that have more complex  
171 cytogenetics than LAML. This cytogenetic complexity could result in either more false positives  
172 or false negatives, as occurs with other algorithms (Stransky et al., 2014; Yoshihara et al., 2015;  
173 Van Allen et al., 2016). As one computational test of this, we used the principle of cancer  
174 biology that the total number of fusions detected should be correlated with an orthogonal  
175 measure of a tumor's genome stability, as measured by the mutation rate of TP53 (Forment et  
176 al., 2012). sMACHETE has much higher correlation with TP53 mutation rate and number of  
177 fusions identified per sample compared to the current best performing published fusion caller,  
178 ChimerSeq, across tumor types (Pearson correlation .6 and .06 respectively; Spearman rho .45  
179 and .07 respectively; Fig. 4D); and in general calls more fusions in tumors with high TP53  
180 mutation rates, and fewer than ChimerSeq in less cytogenetically complex tumors while  
181 retaining tight control of false positives in other samples.

182 ChimerSeq and sMACHETE report similar numbers of fusions in the same TCGA cohort  
183 of the 278 samples that were analyzed in common (Supplemental File). The set of fusions  
184 (counted as unique gene pairs, ignoring splice variants) on this set of samples has little overall  
185 concordance: 660 unique fusions are called by ChimerSeq, 525 unique gene pairs expressed  
186 as fusions are called on this set by sMACHETE, and only 213 are common to both algorithms.  
187 Of note, among this list, 8 distinct gene fusions involving HLA or ribosomal protein subunit  
188 genes, proxies for likely false positives due to their high expression, are called by ChimerSeq,  
189 while none are called by sMACHETE. ChimerSeq appears to call no fusions for, and  
190 presumably does not analyze, pancreatic adenocarcinoma (PAAD) tumors. (In our discussion of  
191 other tumor types in this paper, we use abbreviations following TCGA nomenclature. See Fig.  
192 3.)

193 Because the ground truth is not known for most tumors profiled in the TCGA data, we  
194 have investigated the performance on sMACHETE for a handful of well known recurrent gene  
195 fusions beyond LAML. As an example, TMPRSS2-ERG is the most commonly known recurrent  
196 gene fusion in any solid tumor (Maher et al., 2009). We hand-picked 15 prostate cancer tumors  
197 that were positive for TMPRSS2-ERG, as reported in Sadis et al. (2013), to include in the  
198 discovery set. sMACHETE detected 7 splice variants of TMPRSS2-ERG, increasing the  
199 sensitivity of detecting alternative splice variants of fusions and total prevalence of detected  
200 fusions compared to ChimerSeq (Supplemental File and Lee et al., 2017; Gorohovski et al.,  
201 2017). The prevalence of TMPRSS2-ERG in prostate adenocarcinoma (PRAD) (Tomlins et al.,  
202 2008) detected by sMACHETE and ChimerSeq is similar (39% by sMACHETE and 42% by  
203 ChimerSeq).

204

205 **sMACHETE predicts novel recurrent fusions validated in independent clinical samples**

206 Apart from sMACHETE's rediscovery of well-known recurrent gene fusions, the vast  
207 majority of sMACHETE's predicted fusions were present in only a small number of tumors (see  
208 Fig. 5 and Supplemental Table 1). While generally low prevalence, several novel fusions were  
209 detected at sufficient frequency that they would be expected to appear in an independent,  
210 moderate number of primary tumor samples that our laboratory could reasonably test.

211 Using sMACHETE's predictions from TCGA data, we attempted to validate four novel  
212 and one previously reported recurrent fusions on nine primary ovarian tumor samples, labeled  
213 (A-I). We first tested for two novel fusions: CPSF6-CHMP1A, a fusion consistent with deriving  
214 from interchromosomal rearrangement, and RB1-ITM2B, a rearrangement between two  
215 neighboring genes. Samples (C,E,F) (33%) had PCR products of the expected size for CPSF6-  
216 CHMP1A and samples (B,E,F,G,H,I) (>50%) had PCR products of the expected size for RB1-  
217 ITM2B. Sanger sequencing of the PCR products produced the expected sequences (see  
218 Figures 6A and 6B, Methods and Supplemental File). RB1-ITM2B could be explained by a  
219 cancer-specific circular RNA or a local genomic rearrangement (see Fig. 6A); we have not  
220 previously detected this sequence in normal samples (Szabo et al., 2015, Hsieh et al., 2017).  
221 While we did not attempt to distinguish whether an underlying DNA change was responsible for  
222 the RB1-ITM2B fusion, the estimated prevalence of RB1-ITM2B from poly(A) selected TCGA  
223 libraries was only 2%. This is much lower than the 55% prevalence detected by PCR, and is  
224 consistent with the hypothesis that RB1-ITM2B is a circRNA that is depleted in poly(A) selected  
225 libraries.

226 We tested the same samples for three other fusions detected by sMACHETE: a  
227 previously known germline fusion, TFG-GPR128 (Chase et al., 2010) and two predicted  
228 ovarian-specific recurrent fusions, METTL3-TM4SF1 and RCC1-UBE2D2. Consistent with the  
229 range of previous reports of the prevalence of TFG-GPR128 in the population (3/120 as  
230 reported in Chase et al., 2010, 95% CI: 0.5%-7.1%), sMACHETE estimates its frequency in  
231 TCGA data to be <1% in sarcoma (SARC), 2.2% in PAAD, and 1.4% in ovarian serous  
232 cystadenocarcinoma (OV) (see Supplemental Table 1). The predicted frequency of METTL3-  
233 TM4SF1 and RCC1-UBE2D2 were similarly low (5.9% and 3.8% of OV cases, respectively). All  
234 samples tested by PCR for these three fusions were negative, which is consistent with their  
235 estimated prevalence under a simple binomial sampling model. Because of the low prevalence,  
236 a much larger sample size, greater than one hundred, would be necessary to provide sufficient  
237 statistical power to test if these fusions are recurrent.

238

### 239 **Fusions identified by sMACHETE are enriched in known oncogenes**

240           Because we, and the vast majority of researchers, do not have access to TCGA samples  
241 for additional PCR validation, we used orthogonal computational tests of sMACHETE's novel  
242 fusion predictions to support the assertion that most of sMACHETE's fusion predictions are not  
243 artifacts. We first investigated the distribution of functional gene ontologies of reported fusion  
244 partners, as these are not used by sMACHETE and so provide an independent test of whether  
245 sMACHETE is identifying a potentially important biological signal. To test whether the putative  
246 fusions identified by sMACHETE are enriched for genes in known cancer pathways, for each  
247 cancer type we tested for enrichment of genes present in the Catalogue of Somatic Mutations in  
248 Cancer (COSMIC) database or that include the word "kinase" in their annotation (Forbes et al.,  
249 2014; Methods). In six of the ten cancer types profiled by sMACHETE, the fraction of samples  
250 with fusions identified and annotated as either COSMIC or kinase exceeds 20%, a rate much  
251 greater than expected by chance (Methods and Fig. 5C). Among samples with any fusion  
252 reported, the largest enrichment for COSMIC or kinase annotated genes are in PRAD (93%)  
253 and LAML (77%), as expected because the most frequent gene fusions in PRAD involve the  
254 ETS family of transcription factors (COSMIC genes), and LAML is a disease where fusions have  
255 been intensively studied, include known drivers, and whose partners are therefore annotated as  
256 COSMIC genes (Forbes et al., 2014; Fig. 5).

257

### 258 **Ovarian cancers have high fusion prevalence and are enriched kinase and COSMIC** 259 **genes**

260           The most common genetic lesion in ovarian cancer is the TP53 mutation, present in 88%  
261 of cases (cBioPortal, retrieved July 18, 2017, see Gao et al., 2013), although there is debate in  
262 the literature that this prevalence is an underestimate. Regardless, other drivers must exist  
263 because, for example, TP53 mutations are not sufficient to cause cancers (Martincorena et al.,  
264 2015). In OV, such explanatory driving events are as yet unknown (Bowtell et al., 2015). The  
265 prevalence of TP53 mutations generates the hypothesis that the resulting genome instability  
266 could generate fusions responsible for driving some fraction of these cancers, but which have  
267 been missed because of shortcomings in other available algorithms; we sought to test this  
268 hypothesis.

269           sMACHETE reports 91% of all ovarian cancers in its discovery set to have a gene  
270 fusion, the highest rate of any disease we profiled. 54% of ovarian tumors contain a fusion  
271 involving a kinase or COSMIC gene, a higher frequency than any other profiled disease (see



272 Fig. 5). Prevalent recurrent fusions were not detected, with the exception of one that is most  
273 parsimoniously explained by being circRNA: a putative fusion between C10orf68 and CCDC7, a  
274 pair of genes with overlapping transcriptional boundaries and shared exons, one of only two  
275 fusions called in both our Body Map and tumor samples (Supplemental Table 1). This fusion is  
276 also reported in LAML by a separate group, and is consistent with the fusion being a circular  
277 RNA (Cancer Genome Atlas Research Network, 2013).

278 Recurrent fusions of low prevalence involving genes on different chromosomes, unlikely  
279 to be circRNA, were detected as described above: 3.8% of tumors were estimated to have the  
280 fusion RCC1-UBE2D2. RCC1 is a regulator of chromosome condensation and UBE2D2 is an  
281 ubiquitin conjugating enzyme. RCC1-UBE2D2 is predicted to be specific to ovarian tumors. The  
282 fusion METTL3-TM4SF1 of METTL3, a methyltransferase-like protein involved in splicing, and  
283 TM4SF1, a transmembrane protein of unknown function, was seen in 5.9% of tumors and also  
284 specific to ovarian cancer.

285 sMACHETE predicts that the rate that fusions are present in ovarian cancer is higher  
286 than previously reported by other analyses of TCGA data (Yoshihara et al., 2015; Earp et al.,  
287 2017). To be called by sMACHETE, a fusion must be nominated by MACHETE. Thus, the  
288 comprehensive tests of MACHETE's false positive rates in Hsieh et al. (2017) imply a low false  
289 positive rate for sMACHETE. This, together with the results in this paper, argue against the  
290 possibility that sMACHETE's discoveries are due to 'lax controls' on false positive rates and  
291 instead strongly suggest a biological differentiation of ovarian cancer fusion expression from  
292 other cancers we profiled. The enrichment of COSMIC genes in fusion partners further  
293 supports this.

294 Further, our discovery of a high fraction of gene fusions in ovarian cancer is consistent  
295 with an orthogonal metric of genome instability in this disease, its TP53 mutation rate of 88%  
296 (Methods; TCGA, 2011). This, along with sMACHETE's specificity on normal controls, supports  
297 the interpretation that fusions, perhaps relatively rare or private events, could be an  
298 unappreciated driver of ovarian cancers (see Fig. 5). Functional tests of this hypothesis are  
299 important but beyond the scope of this paper, and there is an important clinical implication that if  
300 rare or low prevalence fusions are common, and if some are potentially druggable, then  
301 'personalized' tumor profiling would be needed to inform treatment.

302

### 303 **Statistical analysis of private fusions predicts new oncogenes**

304 Fusions that recur with relatively high frequencies across cases are appreciated to have  
305 a selective advantage for tumors, because recurrence has historically been used as a proxy for

306 function in cancer biology. However, statistical signals in rare fusions, including private fusions  
307 that are observed only once, could still have statistical features that distinguish them from  
308 molecular events deemed ‘passengers’. While intuition for this idea has been appreciated (Lin et  
309 al., 2016; Latysheva et al., 2016), statistical formalism has been missing. Mathematical  
310 modeling shows that such private fusion expression is, somewhat counter-intuitively, to be  
311 expected in the 739 cases we profiled if a moderate fraction of human genes could function as  
312 oncogenes when participating in fusions (Supplemental File). Intuitively, this is because of  
313 quadratic growth in the number of possible combinations of fusions if a group of genes can  
314 serve as oncogenic 5’ or 3’ partners, which implies very high sampling may be required to  
315 observe recurrence.

316 A large number (660) of the 1006 gene fusions (760 unique gene fusions, as some occur  
317 multiple times) identified by sMACHETE in the TCGA tumor set are observed only once in our  
318 set of profiled tumors (i.e., they are private). (The number 660 is a numerical coincidence with  
319 the 660 reported earlier regarding fusions called by ChimerSeq.) We tested whether the 5’ or 3’  
320 partners reappeared on the list of private fusions more often than would be expected compared  
321 to a null distribution using a statistical model that is a generalization of the well-known “birthday  
322 problem” (Henze, 1998, Supplemental File). We omitted recurrent fusions in the analysis of  
323 enrichment for 5’ and 3’ partners as a conservative measure to prevent a bias for re-discovering  
324 known oncogenic fusions and enriching a statistical signal, because many gene fusions that are  
325 recurrent have had functional assignments as oncogenes because there is bias towards  
326 studying them.

327 This analysis establishes both the excess or ‘effect size’ for the number of genes  
328 recurrently present in a 5’ and 3’ fusion and statistical significance (Supplemental File).  
329 sMACHETE reports 38 recurrent 5’ partners and 33 recurrent 3’ partners, with both having  
330 corresponding p-values  $\ll 10^{-5}$ , which are highly statistically significant findings. Moreover, this  
331 is a finding with a large effect size: sMACHETE predicts tens of novel oncogenic fusion partners  
332 from this analysis, which is based on profiling completely private gene fusions; deeper  
333 sequencing or larger sample sizes and more cases or cancer types could further increase this  
334 number.

335 In principle, any gene fusion, including recurrent gene fusions, may be expressed due to  
336 a predisposition for genomic rearrangement between two loci rather than RNA expression  
337 conferring a particular advantage to the tumor. Thus, in addition to the above statistical  
338 evidence, we investigated the gene ontology of genes with multiple partners using the logic that  
339 gene fusions can activate oncogenes through a variety of mechanisms, for example those that

340 result in omission of a functional domain through truncation (Shirole et al., 2016) that could have  
341 similar effects to point mutations. If our analysis is identifying a real signal, we expect some  
342 known oncogenes should be reidentified and enriched as gene partners identified in the above  
343 analysis.

344 We find that known oncogenes are amongst the most significantly enriched 5' and 3'  
345 partners in private gene fusions. For example, RALA, a Ras-family G-protein and known  
346 oncogene (Lim et al., 2005), has three distinct partners found in OV and GBM; to our knowledge  
347 it has not been previously reported as a recurrent fusion partner, a feature suggesting that it  
348 functions as an oncogene through gene fusion. A fourth fusion involving RALA, RALA-YAE1D1,  
349 was identified by sMACHETE as a recurrent gene fusion in OV (see Supplemental Table 1), and  
350 hence did not contribute to RALA's score by this method. ZBTB20, a known oncogene (Lim et  
351 al., 2005; Zhao, Ren, and Tang, 2014), was also recovered purely on the basis of participating  
352 in private fusions. SORL1 (Uren et al., 2008), a putative oncogene, had the highest diversity of  
353 5' and 3' partners. UVRAG, a tumor suppressor with activating oncogene activity (He and Liang,  
354 2015), was also found to have multiple partners and has previously not been reported as  
355 participating in fusions. Many other genes on sMACHETE's list had statistical signal consistent  
356 with being novel oncogenes (see Supplemental Table 1).

357

### 358 **Pan-cancer analysis reveals novel rare recurrent fusions expressed in multiple cancer** 359 **types**

360 Classically, recurrent gene fusions have been considered to be specific to particular  
361 tumor-types, such as BCR-ABL1 fusions in CML, EWSR1-FLI1 fusions in Ewing's sarcoma, and  
362 TMPRSS2-ERG fusions in prostate cancers. Next-generation sequencing has revealed  
363 exceptions to these initial findings, such as the existence of BCR-ABL1 fusions in LAML and the  
364 surprising discovery of EWSR1-FLI1 fusions in pancreatic neuroendocrine tumors (Scarpa et  
365 al., 2017).

366 These examples raise the possibility that within a single cancer type (in the above  
367 example, LAML or pancreatic neuroendocrine tumors) low-prevalence recurrent gene fusions  
368 could be drivers of these specific tumor cases above, and more generally that recurrent fusions  
369 that are rare within a tumor type could drive some cancers. In this scenario, either very high  
370 sample sizes or pan-cancer analysis would be necessary to detect them. Further, if some of  
371 these fusions were recurrent across a pan-cancer panel, but had low overall prevalence,  
372 surveys of the TCGA datasets by consortia studying a single tumor may have missed them  
373 because such analysis typically involves profiling only one disease. We sought to test if, like

374 private fusions, sMACHETE identified rare recurrent fusions that were observed at rate higher  
375 than expected by chance and that would be consistent with being under selection  
376 (Supplemental File).

377 sMACHETE predicted 100 recurrent gene fusions, indeed far more than would be  
378 expected by chance (Supplemental File). This list includes fusions detected in more than one  
379 cancer and those that involve partners with annotations indicating potential druggability, such as  
380 kinases, chromatin remodeling complexes, and other signaling molecules (e.g., Strawberry  
381 Notched Homolog, SBNO2, in the putative fusion product SBNO2-SERINC2; Supplemental  
382 Table 1). Another example is a fusion involving the ribosomal protein kinase RPS6KB1-VMP1,  
383 previously identified as a recurrent fusion in breast invasive carcinoma (BRCA) (Inaki, et al.,  
384 2011), which was detected for the first time in other cancer types, such as lung adenocarcinoma  
385 (LUAD) and OV (Supplemental Table 1). PAAD, which had previously lacked reports of  
386 recurrent fusions, was found to harbor a group of low-prevalence recurrent fusions when all  
387 cancer types were used to estimate recurrence. Some of these rare recurrent gene fusions were  
388 present across tumor types in addition to PAAD; for example, ERBB2-PPP1R1B was detected  
389 in two total tumors across TCGA including once in PAAD. The examples above represent  
390 fusions that in principle, could conceivably be targetable with current drugs (Supplemental Table  
391 1), pending further tests. They show the potential for fusions, and not just point mutations, to  
392 stratify patients clinically.

393

## 394 **Discussion**

395 Some of the first oncogenes were discovered with statistical modeling that linked  
396 inherited mutations and cancer risk (e.g. Knudson, 1971). The advent of high-throughput  
397 sequencing has promised the discovery of novel oncogenes which can inform basic biology and  
398 provide therapeutic targets or biomarkers (Cibulskis et al., 2013; Lawrence et al., 2014).

399 However, unbiased, sequencing-based, methodologies for discovery of novel oncogenic  
400 gene fusions have been only partially successful. Many likely driving, and druggable, gene  
401 fusions have been identified by high-throughput sequencing, but studies reporting them have a  
402 non-tested or non-trivial false positive rate even using heuristic or ontological filters, making  
403 them unreliable for clinical use. These problems also limit their sensitivity in unbiased screens of  
404 massive data sets to discover fusions, novel oncogenes or signatures of evolutionary advantage  
405 for rare or private gene fusions.

406 In this paper, we present sMACHETE, a unified, reproducible statistical algorithm to  
407 detect gene fusions in RNA-Seq data set without human-guided filtering. sMACHETE has

408 significantly lower false positive rates than other algorithms. These filters have not sacrificed  
409 detection of known true positives. Further, sMACHETE assigns a statistical score that can be  
410 used to prioritize fusions on the basis of statistical support, rather than the absolute read counts  
411 supporting the fusion. Because of this, like any statistical test, by adjusting the threshold on  
412 scoring, sMACHETE's discovery rate can be tuned to adjust the trade-off between sensitivity  
413 and specificity, a feature unavailable in other algorithms but of potential scientific and clinical  
414 utility (Hsieh et al., 2017).

415         The sMACHETE algorithm improves detection of gene fusions that have been missed by  
416 other algorithms' list of "high confidence" gene fusions. Analysis of these gene fusions uncovers  
417 new cancer biology: evidence that gene fusions are more prevalent than previously thought in  
418 high grade serous ovarian cancers, which lack explanatory oncogenic events, and perhaps are  
419 a contributing driver of these cancers. Unlike other algorithms, sMACHETE finds an enrichment  
420 of fusions in ovarian cancers that is consistent with the extremely high representation of TP53  
421 mutations in these tumors.

422         Also, sMACHETE allows for the first rigorous and unbiased quantification of gene  
423 fusions in solid tumors, and for tests of whether partners in gene fusions are present at greater  
424 frequencies than due to chance. We find positive results, suggesting that gene fusions, even if  
425 not recurrent themselves, are under selection by the tumor. Many fusion partners are detected  
426 in more than one cancer type, which suggests that fusions may be lesions like point mutations,  
427 present across tumors rather than tumor-defining, and suggests that by focusing on one tumor  
428 type to detect recurrence, some important cancer biology is lost. Finally, it is also possible that  
429 some fusions identified by sMACHETE, especially those that are local, could be germline  
430 fusions, passengers or perhaps markers of genetic predisposition for cancer risk, topics we  
431 intend to explore further in other work.

432         While sMACHETE has increased the accuracy of fusion detection, there are two obvious  
433 extensions of this work. First, we could include all samples with known, clinically validated  
434 fusions in sMACHETE's discovery set, enabling a strictly higher chance of discovering clinically  
435 actionable events. This might further extend the list of potentially druggable fusions that  
436 sMACHETE finds. Above, we described fusions between genes where one gene can be  
437 drugged by existing therapies, including ERBB2 (HER2/neu). Further work with a clinical focus  
438 is needed to determine the extent of potentially druggable fusions identified by sMACHETE,  
439 including determinations of whether protein domains targeted by these drugs are included in the  
440 fusion. Second, we have limited our analysis to fusion RNAs that occur at annotated exon-exon  
441 boundaries; we believe that extending the statistical approaches used to discover gene fusions

442 may allow us to relax the requirement that gene fusions be detected at annotated exonic  
443 sequences, without sacrificing the false positive rate. Doing so will provide a more powerful test  
444 of whether genomic instability in cancers results in gene fusions that are a “passenger” of this  
445 instability or that have currently under-appreciated functional and perhaps clinical importance.

446

## 447 **Methods**

### 448 **An enhanced statistical framework for large scale genomics**

449 We ran MACHETE on a discovery set of 739 samples from 22 cancers in the TCGA,  
450 consisting of a large fraction of LAML (n=65, 37% of individuals represented in the TCGA  
451 database), serous ovarian cancer (n=82, 19% of individuals with primary tumors in the  
452 database), pancreatic cancer (n=101, 57% of individuals with primary tumors) and glioblastoma  
453 (n=92, 59% of individuals with primary tumors) and a small fraction of the other cancers (399 in  
454 18 cancers, 6% of individuals with primary tumors profiled by the TCGA). The remaining  
455 samples were designated and used as “testing” data (see Table 1, Supplemental Table 2, Fig. 3  
456 and Supplemental File). As negative controls, we analyzed Illumina Human Body Map data sets  
457 (Table 2) because, as described by the TCGA consortium, samples classified as “Solid Tissue  
458 Normal” in the TCGA data sets are not consistently molecularly normal. In the discovery step,  
459 due to cost limitations, we deeply sampled a subset of tumors; OV, GBM, and PAAD were  
460 selected as diseases where early detection or new drug targets could have great impact, and  
461 LAML was selected due to its extensively studied cytogenetics.

462 We constructed Sequence Bloom Trees (SBTs) for the Illumina Body Map data and for  
463 the RNA-Seq data from each primary tumor from ten cancers with the TCGA dataset: LAML,  
464 BRCA, cervical squamous cell carcinoma and endocervical adenocarcinoma (CESC), colon  
465 adenocarcinoma (COAD), GBM, LUAD, OV, PAAD, PRAD, and SARC. We queried the SBT  
466 with all fusions nominated in the discovery step that passed a statistical threshold  
467 (Supplemental File).

468 We used the discovery set to generate a list of fusions passing MACHETE’s statistical  
469 bar (see Supplemental Table 3, Fig. 1), including those fusions nominated by running  
470 MACHETE on negative controls from the Body Map. We then queried all data sets for any  
471 fusions found in any discovery set (see Fig. 1). We estimated the incidence of each fusion in  
472 each sample type (each TCGA disease or Body Map) with SBTs. Next, we used standard  
473 binomial confidence intervals to test for consistency of the rate that fusions were present in the  
474 samples used in MACHETE’s discovery step and the rate that they were found in the SBT.  
475 Fusion sequences that were more prevalent across the entire data set than is statistically

476 compatible with the predicted prevalence from the discovery set were excluded from the final list  
477 of fusions (see Fig. 1).

478 For intuition on why this step is important, consider the scheme in Figure 1: given an  
479 exon-exon junction query sequence that could be generated by sequencing errors convolved  
480 with gene homology or ligation artifacts, SBTs will not consider the alignment profile of all reads  
481 aligning to this junction as MACHETE does, e.g., reads with errors or evidence of other artifacts,  
482 because reads with mismatches with the query sequence are by definition censored by the  
483 SBT. As a result, the SBT, like other algorithms, can have a high false positive rate due to: (a)  
484 false positives intrinsic to the Bloom filters used in the SBT (Solomon and Kingsford, 2016); (b)  
485 false positive identification of putative fusions due to events such as depicted in Figure 1, even  
486 in the presence of a null false positive rate by the SBT itself (Szabo et al., 2015; Hsieh et al.,  
487 2017). False positives as in (b) can arise as follows: if a single artifact (e.g. a ligation artifact  
488 between two highly expressed genes) in a single sample passes MACHETE's statistical  
489 threshold in the discovery step, this artifact will be included as a query sequence, and the SBT  
490 could detect it a high frequency because the statistical models employed by MACHETE are not  
491 used by the SBT (see Fig. 1). Testing for the consistency of the rate of each sequence being  
492 detected in the discovery set with its prevalence as estimated by SBTs controls for the multiple  
493 testing bias described above (see below and Fig. 1).

494 See the Supplemental File for more detail about the statistical framework.

495

## 496 **Data availability statement**

497

498 Access to the data used in this paper is controlled by the NCI and can be requested by following  
499 the instructions located at <https://gdc.cancer.gov/access-data/obtaining-access-controlled-data> .

500

## 501 **MACHETE methodology and Cloud Computing Implementation**

502 The MACHETE algorithm was run on 739 samples from the TCGA database using the  
503 Seven Bridges Cancer Genomics Cloud (CGC) platform. For details, see the Supplemental File.

504

## 505 **sMACHETE Methodology: Post-processing of MACHETE output and generation of SBT** 506 **queries**

507

508 Technical details of the algorithm and analysis are described in the Supplemental File, and the  
509 Supplemental File lists the github sites where the code is available.

510

511 **Calculations for fusion, COSMIC and kinase fusion prevalence.**

512

513 For reporting of COSMIC and kinase fusion prevalence in tumors profiled by sMACHETE, SBT  
514 reports, for each query sequence passing sMACHETE thresholds, were generated on a per-  
515 tumor basis, with a matrix of sample by fusion presence/absence statistics. Samples were  
516 included if they were present in the SBT and in the MACHETE discovery set. COSMIC genes  
517 and genes annotated as “involved in a kinase pathway” were defined by the annotations in the  
518 cancer\_gene\_consensus.csv file downloaded from the COSMIC website and hg19 RefFlat  
519 respectively, implying the chance that a randomly chosen gene would be annotated with the  
520 word ‘kinase’ or found in the COSMIC file is <3%. A gene was defined as having the term  
521 “kinase” if its refFlat description included the word “kinase”: 4590 out of 207194 distinct  
522 transcript names with products annotated with the word kinase were identified in this refFlat file;  
523 there are 595 COSMIC genes, out of all human genes.

524

525 **Calculations for expected number of recurrent 5’ and 3’ partners.**

526

527 As a test of the likelihood of observing our results, we employ a statistical model of the  
528 probability of observing at most the number of repeated genes that we do observe, under the  
529 assumption that the genes in each fusion pair are randomly chosen. For the technical statistical  
530 framework, see the Supplemental File.

531

532 **File downloads:**

533 The following files were downloaded on 12/5/2016 from

534 <http://cancer.sanger.ac.uk/cosmic/download>

535 using sftp to download it from: /files/grch38/cosmic/v77/cancer\_gene\_census.csv

536

537 Hg19 gene annotations were downloaded from the UCSC genome browser using the refFlat  
538 annotation and link: [https://genome.ucsc.edu/cgi-](https://genome.ucsc.edu/cgi-bin/hgTables?hgid=502825941_NQQWFDm7G51vKllgkPhbm9a4N3N4&hgta_doSchemaDb=hg19&hgta_doSchemaTable=refLink)  
539 [bin/hgTables?hgid=502825941\\_NQQWFDm7G51vKllgkPhbm9a4N3N4&hgta\\_doSchemaDb=](https://genome.ucsc.edu/cgi-bin/hgTables?hgid=502825941_NQQWFDm7G51vKllgkPhbm9a4N3N4&hgta_doSchemaDb=hg19&hgta_doSchemaTable=refLink)  
540 [hg19&hgta\\_doSchemaTable=refLink](https://genome.ucsc.edu/cgi-bin/hgTables?hgid=502825941_NQQWFDm7G51vKllgkPhbm9a4N3N4&hgta_doSchemaDb=hg19&hgta_doSchemaTable=refLink)

541

542 The list of COSMIC fusions is at <http://cancer.sanger.ac.uk/cosmic/fusion> .

543



544 Files from Chimeradb (Lee et al., 2016) were downloaded from  
545 <http://203.255.191.229:8080/chimerdbv31/mdownload.cdb> on 12/11/2016.

546  
547 Mutation rates of the TP53 locus found in each available cancer subtype (51 subtypes) of the  
548 Cancer Genome Atlas database were accessed through the cBioPortal cancer genomics portal  
549 (<http://www.cbioportal.org>), accessed on July 18, 2017. A subset of this data was used to  
550 generate Figure 4C, a comparison of TP53 mutation rates to fusion/sample for each cancer  
551 subtype.

552

### 553 **Sequence Bloom Tree Methodology**

554

555 Sequence Bloom Trees (SBTs, Solomon and Kingsford, 2016), data structures developed to  
556 quickly query many files of data of short-read sequences from RNA-Seq data (and other data)  
557 for a particular sequence, were employed. These structures build on the concept of Bloom  
558 filters. The authors published software, which was subsequently Dockerized and wrapped in the  
559 Common Workflow Language (CWL) for use on the Seven Bridges Cancer Genomics Cloud  
560 pilot (Lau et al.; 2017). The supplemental file contains technical details about the methodology  
561 used.

562

### 563 **Ovarian Tumor Specimen Collection**

564 Ovarian cancer samples were collected following procedures approved by the IRB from the  
565 Fred Hutchinson Cancer Research Center (FHRC). Samples were (1) collected at initial  
566 debulking surgery using standardized protocols and (2) reviewed by a gynecological research  
567 pathologist to confirm the histological characteristics of the tissue; all tumor samples used in this  
568 article contained at least 70% malignant epithelium. Clinical data for RT-PCR screened samples  
569 are shown in Supplemental Table 4.

570

### 571 **RT-PCR Validation of fusions**

572

573 Reverse transcription of RNA was performed (600 ng of each Ovarian cancer sample and 1 ug  
574 for neg. control HeLa and K562 total RNA) using Moloney Murine Leukemia Virus Reverse  
575 Transcriptase (M-MLV RT) enzyme (Promega) according to manufacturer's recommendations.  
576 See Supplemental Table 4te for sample information. The reverse transcription was primed with  
577 equal parts of random N6 (PAN facility, Stanford University) at 2 .5 mM final concentration.

578 cDNA reaction was diluted 1:10 and used 1 mL/10 mL PCR reaction and run for 40 cycles.  
579 Reactions were run on a 1x TBE 1.75% Agarose gel and imaged using Alpha Innotech  
580 Alphamager™ (San Leandro, CA) gel imaging system. PCR-validated fusion transcripts were  
581 further confirmed using Sanger sequencing. PCR primers used and validated PCR sequences  
582 can be found below.

583

#### 584 **Primers used and Sanger sequences obtained**

585 For details and primers used, see Supplemental File.

586

#### 587 **Acknowledgments**

588 All RNA-Seq data was generated by The Cancer Genome Atlas project funded by the NCI and  
589 NHGRI. Information about TCGA and the investigators and institutions that constitute the TCGA  
590 Research Network can be found at <https://cancergenome.nih.gov>. We thank Rajat Rohatgi and  
591 Peter Wang for useful discussions and suggestions on the sMACHETE algorithm; Nathan  
592 Watson for kind help with implementing the MACHETE on the CGC; Peter Wang additionally for  
593 assistance with Figures; and Robert Bierman, Brandi Davis-Dusenbery and Kirsten Green for  
594 feedback on the manuscript. This work was supported by NCI grant R00 CA168987-03, NIGMS  
595 grant R01 GM116847, a JIMB seed grant, an NSF CAREER Award, McCormick-Gabilan  
596 Fellowship, and a Baxter Family Fellowship to J.S.. J.S. is an Alfred P. Sloan fellow in  
597 Computational & Evolutionary Molecular Biology. The Seven Bridges NCI Cancer Genomics  
598 Cloud pilot and work by EL were supported in part by the funds from the National Cancer  
599 Institute, National Institutes of Health, Department of Health and Human Services, under  
600 Contract No. HHSN261201400008C.

601

602 **Competing Interests:** Erik Lehnert is an employee of Seven Bridges Genomics.

603

#### 604 **References**

605

- 606 1. Martincorena I, Roshan A, Gerstung M, Ellis P, Van Loo P, McLaren S, et al. Tumor  
607 evolution. High burden and pervasive positive selection of somatic mutations in normal  
608 human skin. *Science*. 2015;348(6237):880-6. doi: 10.1126/science.aaa6806.
- 609 2. Zhang J, Mardis ER, Maher CA. INTEGRATE-neo: a pipeline for personalized gene  
610 fusion neoantigen discovery. *Bioinformatics*. 2017;33(4):555-7. doi:  
611 10.1093/bioinformatics/btw674.

- 612 3. Ragonnaud E, Holst P. The rationale of vectored gene-fusion vaccines against cancer:  
613 evolving strategies and latest evidence. *Ther Adv Vaccines*. 2013;1(1):33-47. doi:  
614 10.1177/2051013613480446.
- 615 4. Liu XS, Mardis ER. Applications of Immunogenomics to Cancer. *Cell*. 2017;168(4):600-  
616 612. doi: 10.1016/j.cell.2017.01.014.
- 617 5. Soda, M., Choi, Y. L., Enomoto, M., Takada, S., Yamashita, Y., Ishikawa, S., ... Mano,  
618 H. (2007). Identification of the transforming EML4-ALK fusion gene in non-small-cell lung  
619 cancer. *Nature*, 448(7153), 561–566. <https://doi.org/10.1038/nature05945>
- 620 6. Nowell, P., & Hungerford, D. (1960). A minute chromosome in human chronic 9  
621 granulocytic leukemia. *Science*, 132(3438), 1488–1501.  
622 <https://doi.org/10.1126/science.132.3438.1488>
- 623 7. Latysheva, N. S., & Babu, M. M. (2016). Discovering and understanding oncogenic gene  
624 fusions through data intensive computational approaches. *Nucleic Acids Research*,  
625 44(10), 4487–4503. <http://doi.org/10.1093/nar/gkw282>
- 626 8. Solomon, B. and Kingsford, C. (2016). Fast search of thousands of short-read  
627 sequencing experiments. *Nature biotechnology*, 34(3): 300–302.  
628 <https://doi.org/10.1038/nbt.3442> . Software downloaded from:  
629 <https://www.cs.cmu.edu/~ckingsf/software/bloomtree/>
- 630 9. Liu, S., Tsai, W. H., Ding, Y., Chen, R., Fang, Z., Huo, Z., ... Tseng, G. C. (2015).  
631 Comprehensive evaluation of fusion transcript detection algorithms and a meta-caller to  
632 combine top performing methods in paired-end RNA-seq data. *Nucleic Acids Research*,  
633 44(5). <https://doi.org/10.1093/nar/gkv1234>
- 634 10. Carrara, M., Beccuti, M., Cavallo, F., Donatelli, S., Lazzarato, F., Cordero, F., &  
635 Calogero, R. A. (2013). State of art fusion-finder algorithms are suitable to detect  
636 transcription-induced fusions in normal tissues? *BMC Bioinformatics*, 14 Suppl 7(Suppl  
637 7), S2. <https://doi.org/10.1186/1471-2105-14-S7-S2>
- 638 11. Kumar, S., Vo, A. D., Qin, F., & Li, H. (2016). Comparative assessment of methods for  
639 the fusion transcripts detection from RNA-Seq data. *Scientific Reports*, 6, 21597.  
640 <https://doi.org/10.1038/srep21597>
- 641 12. Bailey P, Chang DK, Nones K, Johns AL, Patch AM, Gingras MC, et al. (2016) Genomic  
642 analyses identify molecular subtypes of pancreatic cancer. *Nature*. 2016;531(7592):47-  
643 52. doi: 10.1038/nature16965.

- 644 13. Hsieh, G., Bierman, R., Szabo, L., Lee, A.G., Freeman, D., Watson, N., Sweet-Cordero,  
645 E.A., Salzman, J. (2017) Statistical algorithms improve accuracy of gene fusion  
646 detection. *Nucleic Acids Research*, gkx453. <https://doi.org/10.1093/nar/gkx453>
- 647 14. Lee, M., Lee, K., Yu, N., Jang, I., Choi, I., Kim, P., ... Lee, S. (2017). ChimerDB 3.0: an  
648 enhanced database for fusion genes from cancer transcriptome and literature data  
649 mining. *Nucleic Acids Research*. <https://doi.org/10.1093/nar/gkw1083>
- 650 15. Yoshihara, K., Wang, Q., Torres-Garcia, W., Zheng, S., Vegesna, R., Kim, H., &  
651 Verhaak, R. G. W. (2015). The landscape and therapeutic relevance of cancer-  
652 associated transcript fusions. *Oncogene*, 34(37), 4845–54.  
653 <https://doi.org/10.1038/onc.2014.406>
- 654 16. Szabo, L., Morey, R., Palpant, N. J., Wang, P. L., Afari, N., Jiang, C., ... Salzman, J.  
655 (2015). Statistically based splicing detection reveals neural enrichment and tissue-  
656 specific induction of circular RNA during human fetal development. *Genome Biology*, 16,  
657 126. <https://doi.org/10.1186/s13059-015-0690-5>
- 658 17. Tomlins, S. a, Laxman, B., Varambally, S., Cao, X., Yu, J., Helgeson, B. E., ...  
659 Chinnaiyan, A. M. (2008). Role of the TMPRSS2-ERG gene fusion in prostate cancer.  
660 *Neoplasia (New York, N.Y.)*, 10(2), 177–188. <https://doi.org/10.1593/neo.07822>
- 661 18. Stratton, M. R., Campbell, P. J., & Futreal, P. A. (2009). The cancer genome. *Nature*,  
662 458(7239), 719–24. <https://doi.org/10.1038/nature07943>
- 663 19. Shirole, N. H., Pal, D., Kastenhuber, E. R., Senturk, S., Boroda, J., Pisterzi, P., ...  
664 Sordella, R. (2016). TP53 exon-6 truncating mutations produce separation of function  
665 isoforms with pro-tumorigenic functions. *eLife*, 5(OCTOBER2016).  
666 <https://doi.org/10.7554/eLife.17929>
- 667 20. Chase, A., Ernst, T., Fiebig, A., Collins, A., Grand, F., Erben, P., ... Cross, N. C. P.  
668 (2010). TFG, a target of chromosome translocations in lymphoma and soft tissue  
669 tumors, fuses to GPR128 in healthy individuals. *Haematologica*, 95(1), 20–26.  
670 <https://doi.org/10.3324/haematol.2009.011536>
- 671 21. Cancer Genome Atlas Research Network (2013). Genomic and epigenomic landscapes  
672 of adult de novo acute myeloid leukemia. *The New England Journal of Medicine*,  
673 368(22), 2059–74. <https://doi.org/10.1056/NEJMoa1301689>
- 674 22. Papaemmanuil, E., Gerstung, M., Bullinger, L., Gaidzik, V., Paschka, P., Roberts, N., ...  
675 Campbell, P. (2016). Genomic Classification and Prognosis in Acute Myeloid Leukemia.  
676 *N Engl J Med*, 374(23), 2202–2221. <https://doi.org/10.1056/NEJMoa1516192>

- 677 23. Sadis, S. Khazanov, N., Bankhead, A., Cyanam, D., Williams, P., Eddy, S., Wyngaard,  
678 P., and Rhodes, D. High-throughput, systematic analysis of paired-end next-generation  
679 sequencing data to characterize the gene fusion landscape in cancer. Poster retrieved  
680 from  
681 <https://www.thermofisher.com/content/dam/LifeTech/Documents/PDFs/Oncomine/2013A>  
682 [ACR\\_gene fusions.pdf](https://www.thermofisher.com/content/dam/LifeTech/Documents/PDFs/Oncomine/2013A)
- 683 24. Stransky, N., Cerami, E., Schalm, S., Kim, J. L., & Lengauer, C. (2014). The landscape  
684 of kinase fusions in cancer. *Nature Communications*, 5, 4846.  
685 <https://doi.org/10.1038/ncomms5846>
- 686 25. Forment, J. V., Kaidi, A., & Jackson, S. P. (2012). Chromothripsis and cancer: causes  
687 and consequences of chromosome shattering. *Nature Reviews. Cancer*, 12(10), 663–70.  
688 <https://doi.org/10.1038/nrc3352>
- 689 26. Earp MA, Raghavan R, Li Q, Dai J, Winham SJ, Cunningham JM, et al. Characterization  
690 of fusion genes in common and rare epithelial ovarian cancer histologic subtypes.  
691 *Oncotarget*. 2017. doi: 10.18632/oncotarget.16781.
- 692 27. Zack, T. I., Schumacher, S. E., Carter, S. L., Cherniack, A. D., Saksena, G., Tabak, B.,  
693 ... Beroukhi, R. (2013). Pan-cancer patterns of somatic copy number alteration. *Nature*  
694 *Genetics*, 45(10), 1134–1140. <https://doi.org/10.1038/ng.2760>
- 695 28. Gao, J., Aksoy, B. A., Dogrusoz, U., Dresdner, G., Gross, B., Sumer, S. O., ... Schultz,  
696 N. (2013). Integrative analysis of complex cancer genomics and clinical profiles using  
697 the cBioPortal. *Science Signaling*, 6(269), 1–19.  
698 <https://doi.org/10.1126/scisignal.2004088>
- 699 29. Cerami, E., Gao, J., Dogrusoz, U., Gross, B. E., Sumer, S. O., Aksoy, B. A., ... Schultz,  
700 N. (2012). The cBio Cancer Genomics Portal: An open platform for exploring  
701 multidimensional cancer genomics data. *Cancer Discovery*, 2(5), 401–404.  
702 <https://doi.org/10.1158/2159-8290.CD-12-0095>
- 703 30. Maher, C. a, Kumar-Sinha, C., Cao, X., Kalyana-Sundaram, S., Han, B., Jing, X., ...  
704 Chinnaiyan, A. M. (2009). Transcriptome sequencing to detect gene fusions in cancer.  
705 *Nature*, 458(7234), 97–101. <https://doi.org/10.1038/nature07638>
- 706 31. Cancer Genome Atlas Research Network (2011). Integrated genomic analyses of  
707 ovarian carcinoma. *Nature*, 474(7353), 609–15. <https://doi.org/10.1038/nature10166>
- 708 32. Inaki, K., Hillmer, A. M., Ukil, L., Yao, F., Woo, X. Y., Vardy, L. A., ... Liu, E. T. (2011).  
709 Transcriptional consequences of genomic structural aberrations in breast cancer.  
710 *Genome Research*, 21(5), 676–687. <https://doi.org/10.1101/gr.113225.110>

- 711 33. Henze, N. (1998). A poisson limit law for a generalized birthday problem. *Statistics &*  
712 *Probability Letters*, 39(4).
- 713 34. Knudson, A. G. (1971). Mutation and cancer: statistical study of retinoblastoma.  
714 *Proceedings of the National Academy of Sciences of the United States of America*,  
715 68(4), 820–3. <https://doi.org/10.1073/pnas.68.4.820>
- 716 35. Cibulskis, K., Lawrence, M. S., Carter, S. L., Sivachenko, A., Jaffe, D., Sougnez, C., ...  
717 Getz, G. (2013). Sensitive detection of somatic point mutations in impure and  
718 heterogeneous cancer samples. *Nature Biotechnology*, 31(3), 213–219.  
719 <https://doi.org/10.1038/nbt.2514>
- 720 36. Lawrence, M. S., Stojanov, P., Mermel, C. H., Robinson, J. T., Garraway, L. a, Golub, T.  
721 R., ... Getz, G. (2014). Discovery and saturation analysis of cancer genes across 21  
722 tumour types. *Nature*, 505(7484), 495–501. <https://doi.org/10.1038/nature12912>
- 723 37. Gorohovski, A., Tagore, S., Palande, V., Malka, A., Raviv-Shay, D., Frenkel-  
724 Morgenstern, M. (2017). ChiTaRs-3.1 - the enhanced chimeric transcripts and RNA-seq  
725 database matched with protein - protein interactions. *Nucleic Acids Res*, 45(D1): D790-  
726 D795. <https://doi.org/10.1093/nar/gkw1127>
- 727 38. Lin, A., Ptasinska, A., Assi S.A., Kerry, J., Meetei, R.A., Luo, R.T., ... Mulloy, J.C.  
728 (2016). The Transcriptome Heterogeneity of MLL-Fusion ALL Is Driven By Fusion  
729 Partners Via Distinct Chromatin Binding. *Blood*, 128(576).
- 730 39. Latysheva, N.S., Oates, M.E., Maddox, L., Flock, T., Gough, J., Buljan, M., ... Babu,  
731 M.M. (2016). Molecular Principles of Gene Fusion Mediated Rewiring of Protein  
732 Interaction Networks in Cancer. *Mol Cell*, 63(4), 579-92. doi:  
733 10.1016/j.molcel.2016.07.008.
- 734 40. Lim, K.H., Baines, A.T., Fiordalisi, J.J., Shipitsin, M., Feig, L.A., Cox, A.D., ... Counter,  
735 C.M. (2005). Activation of RalA is critical for RAS-induced tumorigenesis of human cells.  
736 *Cancer Cell*, 7(6), 533-545.
- 737 41. Zhao, J., Ren, K., Tang, J. (2014). Zinc finger protein ZBTB20 promotes cell proliferation  
738 in non-small cell lung cancer through repression of FoxO1. *Febs Lett*, 588(24), 4536-42.  
739 doi: 10.1016/j.febslet.2014.10.005.
- 740 42. Uren, A., Kool, J., Matentzoglou, K., de Ridder, J., Mattison, J., van Uitert, M. . . . Adams  
741 D. (2008). Large-Scale Mutagenesis in *p19<sup>ARF</sup>*- and *p53*-Deficient Mice Identifies Cancer  
742 Genes and Their Collaborative Networks, *Cell*, 133(4), 727-741. Doi:  
743 10.1016/j.cell.2008.03.021.

- 744 43. He, S., & Liang, C. (2015). Frameshift mutation of UVRAG: Switching a tumor  
745 suppressor to an oncogene in colorectal cancer. *Autophagy*, 11(10), 1939-40. doi:  
746 10.1080/15548627.2015.1086523.
- 747 44. Scarpa, A., Chang, D.K., Nones, K., Corbo, V., Patch A.M., Bailey, P., ... Grimmond  
748 S.M. (2017). Whole-genome landscape of pancreatic neuroendocrine tumours. *Nature*,  
749 543(7643), 65-71. doi: 10.1038/nature21063.
- 750 45. Peifer, M., Fernandez-Cuesta, L., Sos, M.K., George, J., Seidel, D., Kasper, L.H., ...  
751 Thomas, R.K. (2016). Integrative genome analyses identify key somatic driver mutations  
752 of small cell lung cancer. *Nat Genet*, 44(10), 1104-1110.
- 753 46. Van Allen, E.M., Robinson, D., Morrissey, C., Pritchard, C., Imamovic, A., Carter, S., ...  
754 Nelson, P.S. (2016). A comparative assessment of clinical whole exome and  
755 transcriptome profiling across sequencing centers; implications for precision cancer  
756 medicine. *Oncotarget*, 7(33), 52888-52899. doi: 10.18632/oncotarget.9184.
- 757 47. Saramäki, O.R., Harjula, A.E., Martikainen, P.M., Vessella, R.L., Tammela, T.L.,  
758 Visakorpi, T. (2008). TMPRSS2: ERG Fusion Identifies a Subgroup of Prostate Cancers  
759 with a Favorable Prognosis. *Clin Cancer Res*, 14(11), 3395-400. doi: 10.1158/1078-  
760 0432.CCR-07-2051.
- 761 48. Lau, J., Lehnert, E., Sethi, A., Malhotra, R., Kaushik, G., Onder, Z., . . . Davis-  
762 Dusenbery, B., for The Seven Bridges CGC Team (2017). The Cancer Genomics Cloud:  
763 Collaborative, reproducible, and democratized—a new paradigm in large-scale  
764 computational research. *Cancer Research*. In Press.

766 **List of Figures:**

767 Figure 1: Origin of false positives from MACHETE running on hundreds of data sets. Top left:  
768 MACHETE is designed to use all reads, including those censored by other algorithms, to  
769 generate an empirical p value for each candidate fusion, computed for each data set separately  
770 (Hsieh et al., 2017). Multiple hypothesis testing will result in some fusions passing statistical  
771 thresholds under the null. If a single fusion in a single sample has a significant p-value, the  
772 sequence will be queried by a SBT which does not use statistical models, and the fusion could  
773 be falsely found to be very prevalent. Using confidence intervals based on sampling depth in the  
774 discovery and testing sets, analysis of the the SBT can identify false positives (Supplemental  
775 File).

777 Figure 2: cDNA or mapping artifacts result in inclusion of exon-exon junctions from all  
778 permutations of exons within a fixed genomic radius of X1 with all exons in the radius of Y3 in  
779 the MACHETE index. Some such exon junctions will include degenerate sequences (left).  
780 Because degenerate sequences cannot be mapped uniquely, sMACHETE blinds itself to  
781 detection of fusion RNA containing such highly degenerate sequences (for example, due to Alu  
782 exonization) or with poly(A) stretches at the 5' end.

783

784 Figure 3: Left panel: Total runs per cancer type in the sMACHETE discovery set. Right panel:  
785 Number of cancers in discovery set and in Sequence Bloom Trees for those cancers with  
786 Sequence Bloom Trees built.  
787

788 Figure 4: (A) and (B): 9 unique fusions called by ChimerSeq are also detected in Body Map  
789 samples by a SBT query, some in all Body Map samples, whereas only 3 fusions are called by  
790 sMACHETE in TCGA tumors, and then found in Body Map samples by a SBT query, and only  
791 one in each sample. All three of these fusions are intrachromosomal, a feature not true of six of  
792 the fusions called by ChimerSeq; (C): Performance of sMACHETE compared to ChimerSeq in  
793 LAML: Each algorithm identifies the same number of gold standard LAML fusions, but among  
794 likely false positives, ChimerSeq detects 8 while sMACHETE detects none (Supplemental File);  
795 (D): Unique fusions identified across all samples in each TCGA disease type per total samples  
796 analyzed by sMACHETE. While achieving a significantly lower false positive rate, sMACHETE  
797 has improved sensitivity in some diseases with fractions of fusions detected that are more  
798 consistent with fraction of TP53 mutations in each disease as reported by cBioPortal (Gao et al.,  
799 2013).

800  
801 Figure 5: (A) and (B): Relationship between estimated fusion prevalence between discovery set  
802 and test set as quantified by SBT: (A) all fusions and (B): only fusions in ovarian cancer. (C):  
803 Rate of fusion detection in discovery set including those fusions annotated to include COSMIC  
804 genes and the term kinase; (D) more detailed analysis of highly sampled tumors. ~90% of  
805 ovarian cancers in our discovery set have a sMACHETE-called fusion.  
806

807 Figure 6: (A) In the reference genome, ITM2B is upstream of RB1 and both genes are  
808 transcribed in the sense orientation. In Model 1 (L), a genomic change, such as a tandem  
809 duplication, puts the genomic sequence of RB1 upstream of exons of ITM2B. Transcription from  
810 the RB1 promoter results in a pre-mRNA that is spliced into a fusion mRNA. In Model 2 (R), no  
811 DNA rearrangement occurs, but readthrough transcription from the ITM2B promoter results in a  
812 pre-mRNA that is back-spliced into a circRNA containing exons of RB1 and ITM2B. The  
813 sequenced junction contains 262 nt of RB1 and 78 nts of ITM2B; (B) CPSF6 is transcribed from  
814 chr12 and CHMP1A from chromosome 16. Model for the fusion CPSF6-CHMP1A; sequenced  
815 junction contains 91nt upstream of and 90nt downstream of the fusion junction.  
816

817  
818

#### 819 **List of Tables:**

820

821 Table 1: Number of Samples Analyzed by MACHETE and sMACHETE, and Total Number of  
822 Cases and Samples in TCGA Data Set

823

824 Table 2: List of All Body Map Samples Used

825

#### 826 **List of Supplemental Tables:**

827

828 Supplemental Table 1: sMACHETE outputs from all analyzed Body Map and TCGA samples.



829 Note that, per correspondence with TCGA, we do not publish positions of the fusions found;  
830 these can be shared with researchers upon establishing, in conversation with TCGA, the correct  
831 protocols. Pan\_cancer denotes the total number of samples in which the splice variant of the  
832 fusion is found by the SBT, summing over all SBTs. AbsPos1Pos2Diff is the absolute value of  
833 the difference between position 1 and position 2. MaxFreq denotes the frequency at which the  
834 splice variant appears in the SBT for the disease type. MaxCount is the number of samples in  
835 which the splice variant is found in the SBT for the disease. maxMAFreq and maxCompFreq  
836 refer, respectively, to the frequency of the splice variants as estimated by the SBT per disease  
837 type, in the discovery and test sets, respectively. Note that some fusions could be discovered in  
838 disease A and then found only in the test set for disease B.  
839

840 Supplemental Table 2: Sample IDs and Metadata for Samples Analyzed with MACHETE

841

842 Supplemental Table 3: MACHETE outputs used as input to sMACHETE statistical models and  
843 SBT. Note that, per correspondence with TCGA, we do not publish any sample IDs or positions  
844 of the fusions found; these can be shared with researchers upon establishing, in conversation  
845 with TCGA, the correct protocols. AbsPos1Pos2Diff is the absolute value of the difference  
846 between position 1 and position 2.  
847

848 Supplemental Table 4: List of ovarian tumor samples used for RT-PCR validation

849

850 Supplemental Table 5: Sample IDs and Metadata for Samples Analyzed with SBTs

851

Fig 1

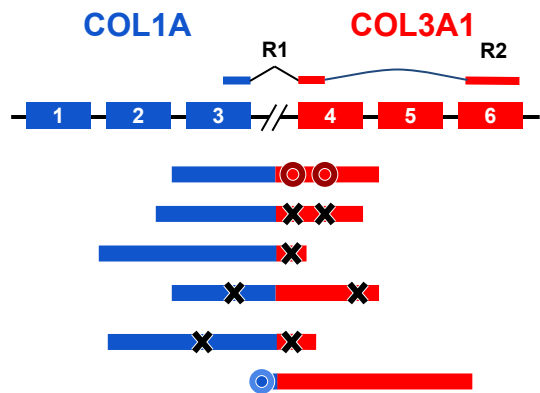

**MACHETE** estimates “ $p\text{-value} = 0.99$ ” since most reads are poor quality match.

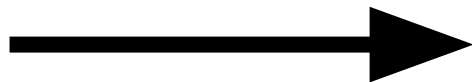

Still, **1 in 100** trials are expected to have a significant  $p$ -value under null, and will be nominated by MACHETE.

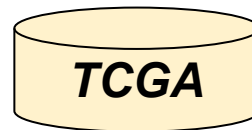

COL1A:COL3A1

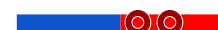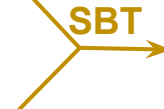

**Sequence Bloom Trees (SBT)** allow rapid search of a large super-set of cases for MACHETE-nominated fusions.

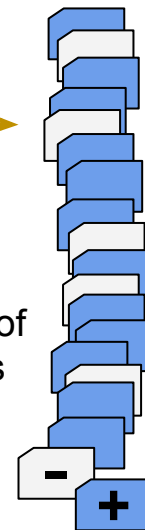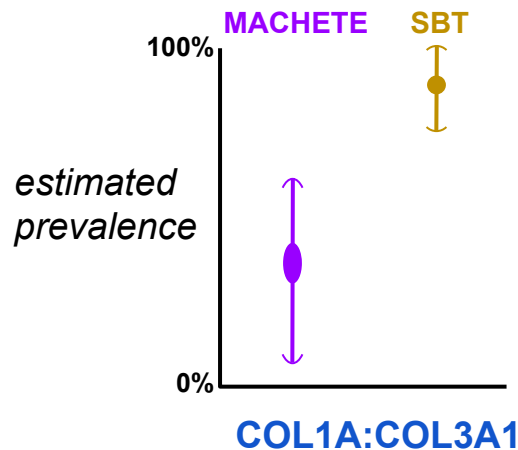

Testing set is statistically inconsistent with discovery set

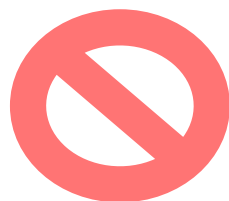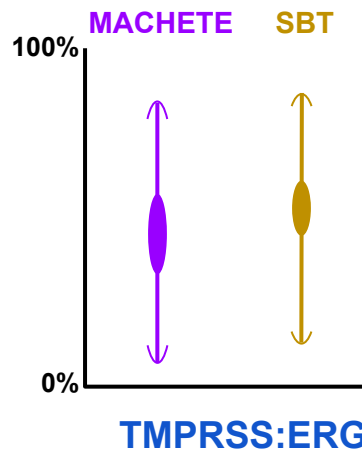

confidence intervals of prevalences are statistically compatible.

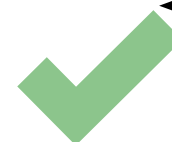

Fig 2

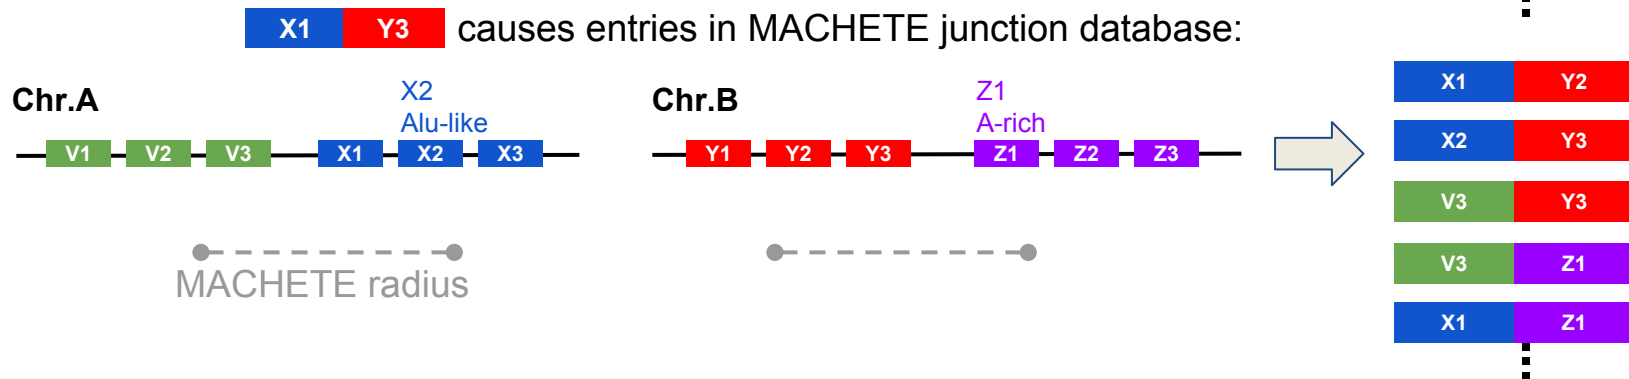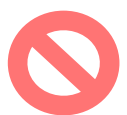

Repetitive sequence 3' end of OCT4 (POU5F1) exon

**POU5F1** : **RTCA**  
CTGAGTAGCTGGGATTACAG : GTGTAAATGCAGACAAAGTT

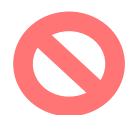

A-rich 5' end of KIAA1984-AS1 exon

**TMEM141** : **KIAA1984-AS1**  
GGTAAGATGATGACAGGTCA : AAAAAAAAAAGGCGAGAATGT

# Fig 3

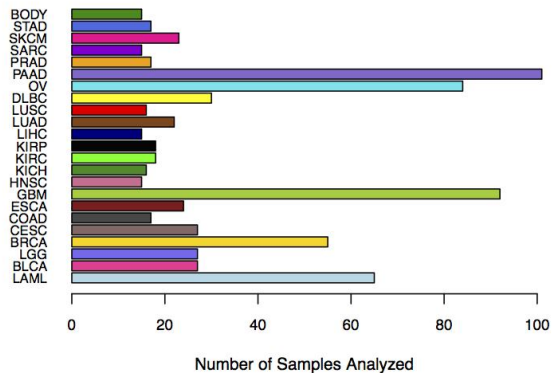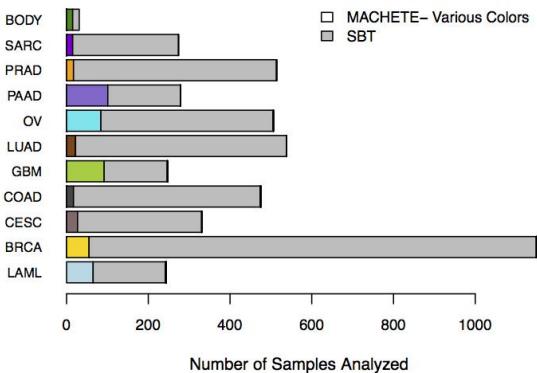

- LAML: Acute Myeloid Leukemia
- BLCA: Bladder Urothelial Carcinoma
- LGG: Brain Lower Grade Glioma
- BRCA: Breast Invasive Carcinoma
- CESC: Cervical Squamous Cell Carcinoma and Endocervical Adenocarcinoma
- COAD: Colon Adenocarcinoma
- ESCA: Esophageal Carcinoma
- GBM: Glioblastoma Multiforme
- HNSC: Head and Neck Squamous Cell Carcinoma
- KICH: Kidney Chromophobe
- KIRC: Kidney Renal Clear Cell Carcinoma
- KIRP: Kidney Renal Papillary Cell Carcinoma
- LIHC: Liver Hepatocellular Carcinoma
- LUAD: Lung Adenocarcinoma
- LUSC: Lung Squamous Cell Carcinoma
- DLBC: Lymphoid Neoplasm Diffuse Large B-cell Lymphoma
- OV: Ovarian Serous Cystadenocarcinoma
- PAAD: Pancreatic Adenocarcinoma
- PRAD: Prostate Adenocarcinoma
- SARC: Sarcoma
- SKCM: Skin Cutaneous Melanoma
- STAD: Stomach Adenocarcinoma
- BODY: BODYMAP

Fig 4

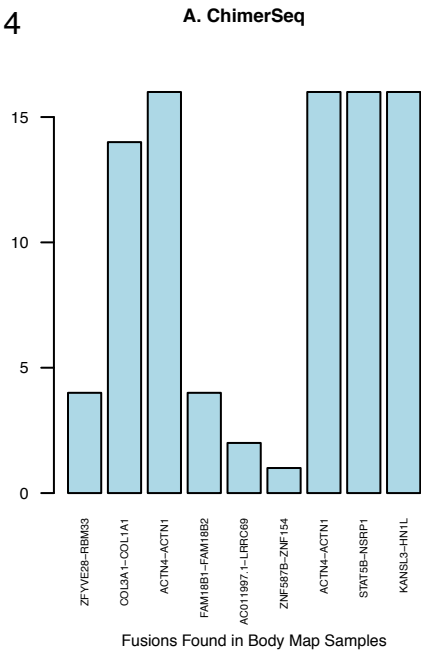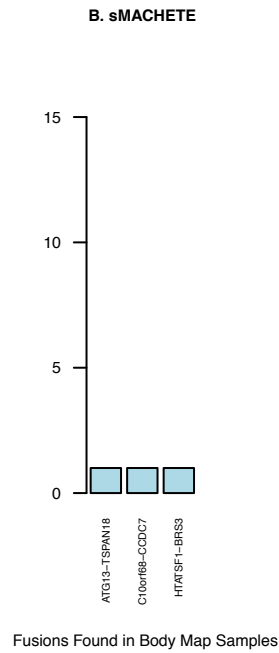

C. Performance of sMACHETE compared to ChimerSeq in LAML on gold standard LAML fusions

|                                                                          | Detected by ChimerSeq                                                                                                        | Detected by sMACHETE |
|--------------------------------------------------------------------------|------------------------------------------------------------------------------------------------------------------------------|----------------------|
| Total Gold Standards (rate)                                              | 9 (18%)                                                                                                                      | 9 (31%)              |
| Fusions between genes with similar gene names (presumed False Positives) | SAFB2-SAFB<br>NBPF1-NBPF15<br>HLA-E-HLA-B<br>HLA-DPA1-HLA-DPB1<br>HLA-C-HLA-B<br>HLA-A-HLA-E<br>EIF3I-EIF3IP1<br>BOD1L1-BOD1 |                      |

D. Fusion and TP53 Prevalence, by TCGA types ordered by ratio for sMACHETE

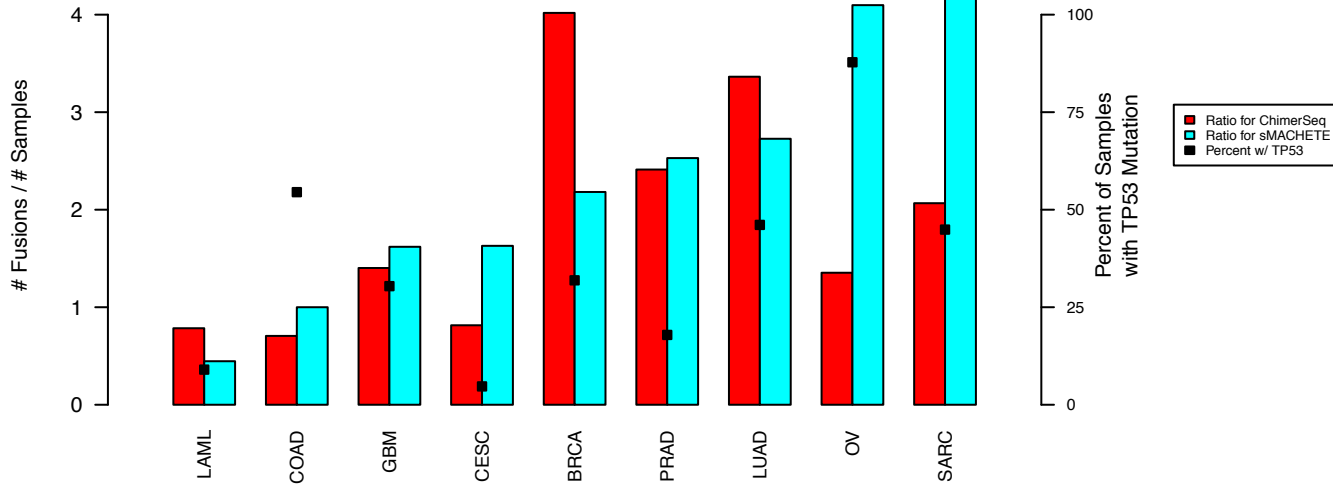

**Fig 5 A. Pan-cancer Discovery vs. Test freq**

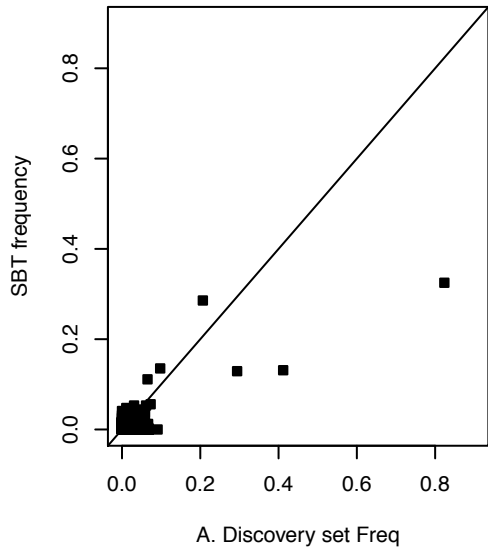

**B. Discovery vs. Test Freq, OV only**

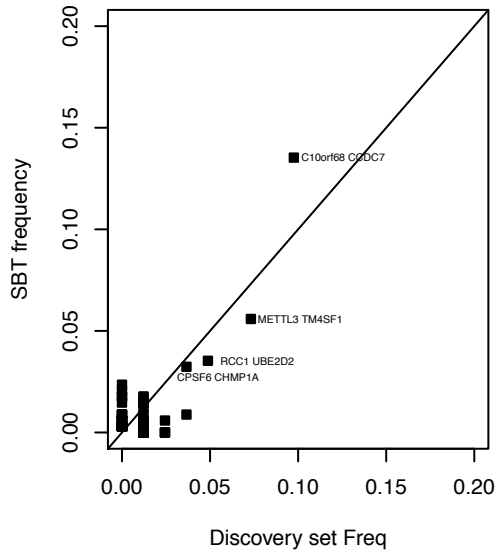

**C. Fusions detected in discovery set**

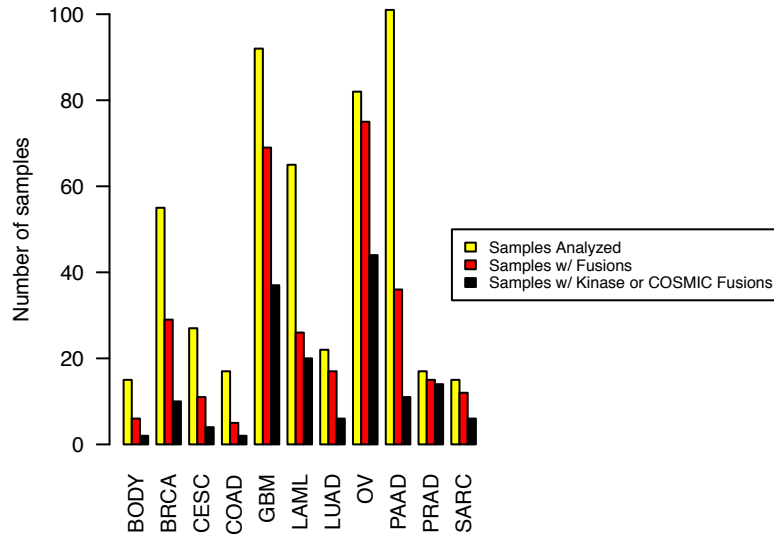

**D. Fusion features in highly sampled tumors**

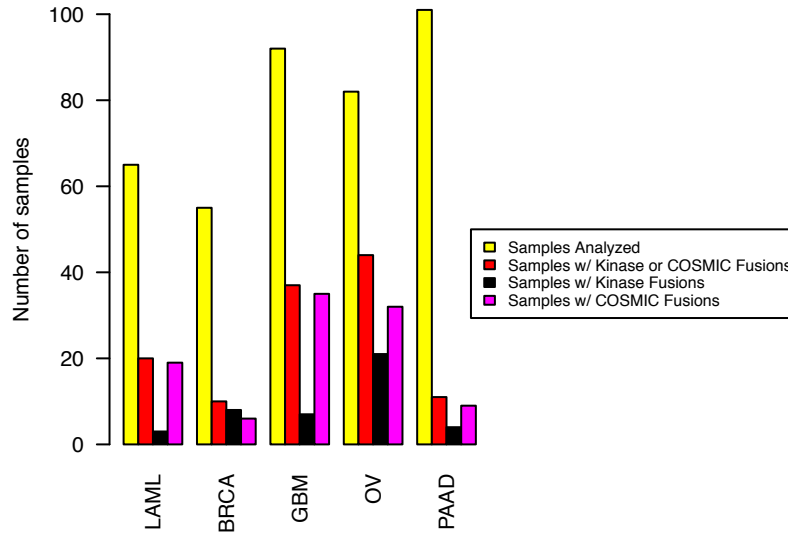

Fig 6A

**Reference genome**

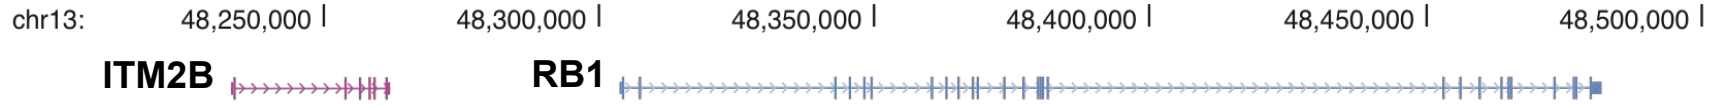

**Model 1: translocation → fusion mRNA**

RB1 / ITM2B

pre-mRNA

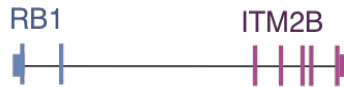

**Fusion Transcript**

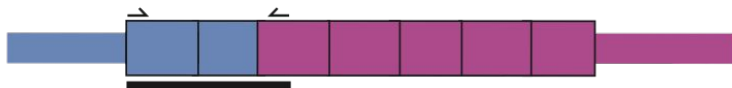

**Model 2: no translocation; fusion circRNA**

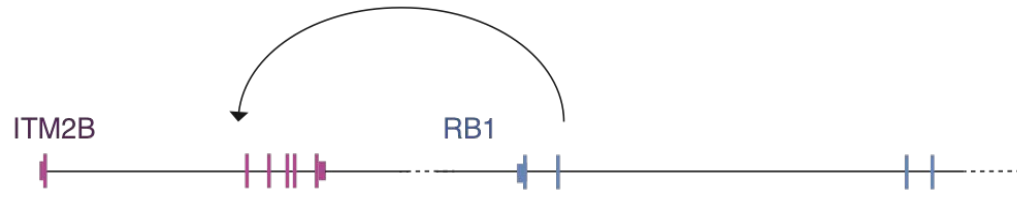

**Circular RNA**

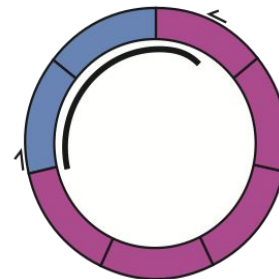

**———— = Sequenced Junction (262 nts of RB1 and 78 nts of ITM2B)**

Fig 6B

Reference genome

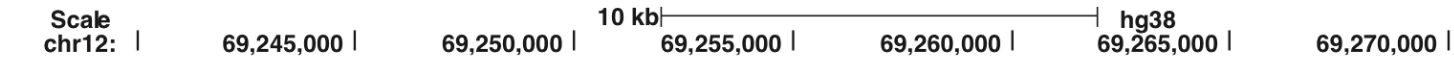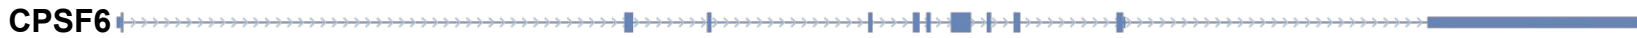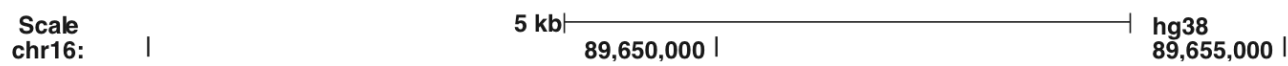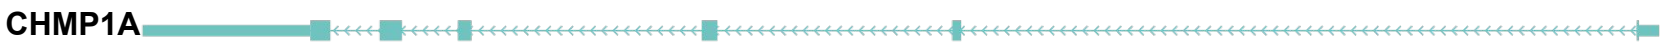

Model: translocation → fusion mRNA

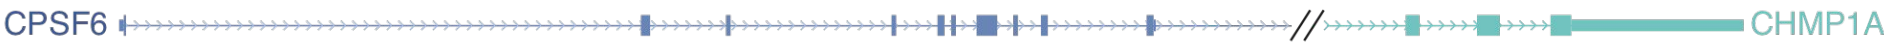

pre-mRNA

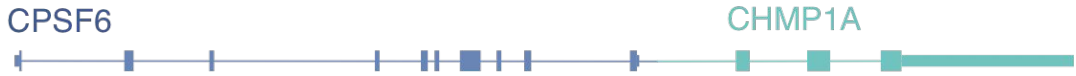

Fusion Transcript

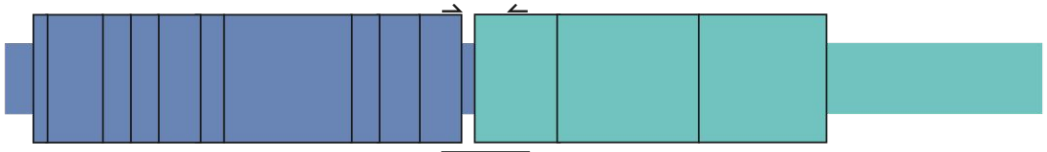

— = Sequenced Junction (91 nts of CPSF6 and 90 nts of CHMP1A)



## Supplemental Figures

# MACHETE output (*chimeras, statistical score*)

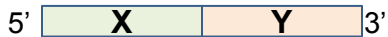

## sMACHETE

$$p_{\text{MACHETE}} < .1$$

$$p_{\text{MACHETE}} \times [\text{max expression}(X) + \text{max expression}(Y)] < 5$$

upper C.I. of anomaly read fraction  $> .25$

sum of mapping quality of 20mers flanking junction  $> 45$   
*(higher = more mappable)*

no more than 6 'A's in the first 8 bases of downstream exon

prevalence in full data  $\leq$  upper C.I. of prevalence in MACHETE subset

**final fusion junctions**

## rationale:

MACHETE assesses likelihood of false match due to read quality, junction coverage, etc.

highly expressed genes are more likely to have reads with sequence error that, by chance, match as a fusion.

many reads for the junction have mate-reads that don't map in a consistent way ("anomaly reads").

this junction filtered out, "POU5F1" part is unmappable (Alu repetitive sequence).

**POU5F1**: RTCA  
CTGAGTAGCTGGGATTACAG : GTGTAAATGCAGACAAAGTT

this junction filtered out, likely due to poly(A) tail rather than fusion. **TMEM141**: KIAA1984-AS1

GGTAAGATGATGACAGGTCA : AAAAAAAAAAGGCGAGAATGT

frequency of specific fusion junction sequences can be rapidly analyzed in full TCGA dataset using **Bloom filter**; if much higher than prevalence seen in the subset analyzed by MACHETE, sequence is likely a false positive (see Fig 1)

**Table 1: Number of Samples Analyzed by Machete and sMACHETE, and Total Number of Cases and Samples in TCGA Data Set**

| Investigation Types | Investigation | Disease Type                                                     | Machete Counts | Number of Cases with Primary or Blood Tumors | Number of Samples used for Building Sequence Bloom Tree |
|---------------------|---------------|------------------------------------------------------------------|----------------|----------------------------------------------|---------------------------------------------------------|
| blca                | TCGA-BLCA     | Bladder Urothelial Carcinoma                                     | 27             | 408                                          | NA                                                      |
| brca                | TCGA-BRCA     | Breast Invasive Carcinoma                                        | 55             | 1095                                         | 1095                                                    |
| cesc                | TCGA-CESC     | Cervical Squamous Cell Carcinoma and Endocervical Adenocarcinoma | 27             | 304                                          | 304                                                     |
| coad                | TCGA-COAD     | Colon Adenocarcinoma                                             | 17             | 458                                          | 458                                                     |
| dlbc                | TCGA-DLBC     | Lymphoid Neoplasm Diffuse Large B-cell Lymphoma                  | 30             | 48                                           | NA                                                      |
| esca                | TCGA-ESCA     | Esophageal Carcinoma                                             | 24             | 184                                          | NA                                                      |
| gbm                 | TCGA-GBM      | Glioblastoma Multiforme                                          | 92             | 155                                          | 155                                                     |
| hnsc                | TCGA-HNSC     | Head and Neck Squamous Cell Carcinoma                            | 15             | 502                                          | NA                                                      |
| kich                | TCGA-KICH     | Kidney Chromophobe                                               | 16             | 66                                           | NA                                                      |
| kirc                | TCGA-KIRC     | Kidney Renal Clear Cell Carcinoma                                | 18             | 533                                          | NA                                                      |
| kirp                | TCGA-KIRP     | Kidney Renal Papillary Cell Carcinoma                            | 18             | 290                                          | NA                                                      |
| laml                | TCGA-LAML     | Acute Myeloid Leukemia                                           | 65             | 178                                          | 178                                                     |
| lgg                 | TCGA-LGG      | Brain Lower Grade Glioma                                         | 27             | 514                                          | NA                                                      |
| lihc                | TCGA-LIHC     | Liver Hepatocellular Carcinoma                                   | 15             | 371                                          | NA                                                      |
| luad                | TCGA-LUAD     | Lung Adenocarcinoma                                              | 22             | 516                                          | 516                                                     |
| lusc                | TCGA-LUSC     | Lung Squamous Cell Carcinoma                                     | 16             | 501                                          | NA                                                      |
| ov                  | TCGA-OV       | Ovarian Serous Cystadenocarcinoma                                | 82             | 422                                          | 422                                                     |
| paad                | TCGA-PAAD     | Pancreatic Adenocarcinoma                                        | 101            | 178                                          | 178                                                     |
| prad                | TCGA-PRAD     | Prostate Adenocarcinoma                                          | 17             | 497                                          | 497                                                     |
| sarc                | TCGA-SARC     | Sarcoma                                                          | 15             | 259                                          | 259                                                     |
| skcm                | TCGA-SKCM     | Skin Cutaneous Melanoma                                          | 23             | 103                                          | NA                                                      |
| stad                | TCGA-STAD     | Stomach Adenocarcinoma                                           | 17             | 416                                          | NA                                                      |
| body                | BodyMap       | BODYMAP                                                          | 15             | NA                                           | 16                                                      |

**Table 2: List of All Body Map Samples Used**

| Age at Diagnosis | Experimental Strategy | Gender | Investigation | Ethnicity        | Primary Site    | Sample Id |
|------------------|-----------------------|--------|---------------|------------------|-----------------|-----------|
| 60               | RNA-Seq               | female | BodyMap       | Caucasian        | thyroid         | ERR030872 |
| 19               | RNA-Seq               | male   | BodyMap       | Caucasian        | testis          | ERR030873 |
| 47               | RNA-Seq               | female | BodyMap       | African American | ovary           | ERR030874 |
| 58               | RNA-Seq               | male   | BodyMap       | Caucasian        | leukocyte       | ERR030875 |
| 77               | RNA-Seq               | male   | BodyMap       | Caucasian        | skeletal muscle | ERR030876 |
| 73               | RNA-Seq               | male   | BodyMap       | Caucasian        | prostate        | ERR030877 |
| 86               | RNA-Seq               | female | BodyMap       | Caucasian        | lymph node      | ERR030878 |
| 65               | RNA-Seq               | male   | BodyMap       | Caucasian        | lung            | ERR030879 |
| 73               | RNA-Seq               | female | BodyMap       | Caucasian        | adipose         | ERR030880 |
| 60               | RNA-Seq               | male   | BodyMap       | Caucasian        | adrenal         | ERR030881 |
| 77               | RNA-Seq               | female | BodyMap       | Caucasian        | brain           | ERR030882 |
| 29               | RNA-Seq               | female | BodyMap       | Caucasian        | breast          | ERR030883 |
| 68               | RNA-Seq               | female | BodyMap       | Caucasian        | colon           | ERR030884 |
| 60               | RNA-Seq               | female | BodyMap       | Caucasian        | kidney          | ERR030885 |
| 77               | RNA-Seq               | male   | BodyMap       | Caucasian        | heart           | ERR030886 |
| 37               | RNA-Seq               | male   | BodyMap       | Caucasian        | liver           | ERR030887 |
